# Supplementary material for: Rapid determination of sulfamethoxazole and trimethoprim illegally added to health products using excitation–emission matrix fluorescence coupled with the second-order calibration method
Source: Royal Society of Chemistry journal article supplement (doi:10.1039/d1ay01391b), 2021-01-01
Supplement: d1ay01391b1.pdf [file d1ay01391b1.pdf]

## Supporting Information

### **Rapid determination of sulfamethoxazole and trimethoprim illegally added into health products using excitation-emission matrix fluorescence coupled with second-order calibration method**

Lu-Zhu Chen, Hai-Long Wu\*, Wan-Jun Long, Tong Wang, Gao-Yan Tong, Ru-Qin Yu

State Key Laboratory of Chemo/Biosensing and Chemometrics, College of Chemistry and Chemical Engineering, Hunan University, Changsha, 410082, P. R. China

\* Author for correspondence:

Tel.: (+86) 731 88821818; Fax: (+86) 731 88821818

E-mail: [hlwu@hnu.edu.cn](mailto:hlwu@hnu.edu.cn) (Hai-Long Wu)

## LEGENDS TO TABLES AND FIGURES

**Table S1** Optimum parameters for TMP and SMZ in the LC-MS/MS method

**Table S2** Predicted results for the calibration set using the SWATLD

**Table S3** The concentration ranges of calibration sets, regression equations and correlation coefficients ( $R^2$ ) related to SWATLD-EEMs method and LC-MS/MS method, respectively

**Table S4** Quantitative results of all spiked samples using LC-MS/MS method

**Fig.S1** The deduction of Rayleigh scattering and Raman scattering in EEM fluorescence data: (a) raw data with Rayleigh scattering and first order Raman scattering; (b) gapped data with scattering being removed in the regions; (c) prosthetic data fitted by an interpolation method.

**Fig.S2** 3-D landscapes of the excitation-emission matrix fluorescence: (a)UA02; (b)UB02; (c) UC02; (d)PA02; (e)PB02 and (f) PC02.

**Fig.S3** Typical extracted MRM ion chromatogram. (a) TMP (290.7  $\rightarrow$  122.8) (b)SMZ (253.8  $\rightarrow$  107.9) (c) Sample C

**Fig.S4** 3-D landscapes of the excitation-emission matrix fluorescence for Sample C

**Table S1** Optimum parameters for TMP and SMZ in the LC-MS/MS method

| Compound | Precursor ion<br>(m/z) | Product ion<br>(m/z) | Dwell time<br>(ms) | Fragmentor<br>(V) | Collision Energy (V) | Polarity |
|----------|------------------------|----------------------|--------------------|-------------------|----------------------|----------|
| TMP      | 290.8                  | 122.8                | 180                | 170               | 35                   | Positive |
|          |                        | 110.0                | 180                | 170               | 35                   | Positive |
| SMZ      | 253.8                  | 107.9                | 240                | 135               | 18                   | Positive |
|          |                        | 156.9                | 240                | 135               | 18                   | Positive |

**Table S2** Predicted results for the calibration set using the SWATLD

|                                           | TMP       | SMZ       |
|-------------------------------------------|-----------|-----------|
| $R^2$                                     | 0.9974    | 0.9948    |
| $RRMSEC^a$                                | 3.9 %     | 5.5 %     |
| RMSEC <sup>b</sup> (ng mL <sup>-1</sup> ) | 12.8      | 7.6       |
| AVG ± S.D.% <sup>c</sup>                  | 101.9±6.9 | 101.1±7.4 |
| LOF <sup>d</sup>                          | 3.4       | 4.9       |

<sup>a</sup> RRMSEC represents relative root mean square error of calibration.  $RRMSEC = \sqrt{\frac{\sum_{n=1}^N (x_n - \hat{x}_n)^2 / (N_c - 1)}{\bar{x}}} \times 100\%$ ,  $x_n$  and  $\hat{x}_n$

are the spiked SWATLD resolved concentration in  $n$ th calibration sample, respectively.  $N_c$  represents the number of calibration samples.  $\bar{x}$  is the mean concentration in calibration samples.

<sup>b</sup> RMSEC, the root-mean-square error of prediction, which is calculated as  $RMSEC = \sqrt{\frac{\sum_{n=1}^N (c_{pre} - c_{act})^2}{N}}$ , here  $I$  is the number of samples,  $c_{act}$  and  $c_{pred}$  are the actual and predicted concentrations of the analytes of interest, respectively.

<sup>c</sup> the average recovery rates (mean ± standard deviation)

<sup>d</sup> LOF is calculated as  $LOF(\%) = 100 \times \sqrt{\frac{\sum (d_i - \hat{d}_i)^2}{\sum (d_i)^2}}$  where  $\hat{d}_i$  are the estimated concentrations of a target analyte in the calibration samples using ATLD method, and  $d_i$  are their corresponding values of nominal concentrations in the calibration samples.

**Table S3** The concentration ranges of calibration sets, regression equations and correlation coefficients ( $R^2$ ) related to SWATLD-EEMs method and LC-MS/MS method, respectively

| Method      | Analyte | c (ng mL <sup>-1</sup> ) | Regression equation <sup>a</sup>             | $R^2$ |
|-------------|---------|--------------------------|----------------------------------------------|-------|
| SWATLD-EEMs | TMP     | 60-600                   | $y = 76.79x - 0.40 \times 10^3$              | 0.994 |
|             | SMZ     | 25-250                   | $y = 77.55x + 1.05 \times 10^3$              | 0.997 |
| LC-MS/MS    | TMP     | 40-800                   | $y = 9.50 \times 10^3 x + 10.55 \times 10^5$ | 0.995 |
|             | SMZ     | 40-800                   | $y = 1.93 \times 10^3 x + 4.75 \times 10^3$  | 0.996 |

<sup>a</sup>  $x$  is concentration (ng mL<sup>-1</sup>) and  $y$  is corresponding response intensity.

**Table S4** Quantitative results of all spiked samples using LC-MS/MS method

| Sample                      | Spiked/ng mL <sup>-1</sup> |       | Predicted/ng mL <sup>-1</sup> |              |
|-----------------------------|----------------------------|-------|-------------------------------|--------------|
|                             | TMP                        | SMZ   | TMP                           | SMZ          |
| Sample A                    |                            |       |                               |              |
| PA01                        | 100.0                      | 240.0 | 105.0[105.0] <sup>a</sup>     | 250.4[104.3] |
| PA02                        | 200.0                      | 150.0 | 209.9[105.5]                  | 152.7[101.8] |
| PA03                        | 400.0                      | 90.0  | 395.4[98.9]                   | 86.1[95.8]   |
| AVG ± S.D.% <sup>b</sup>    |                            |       | 103.1±3.7                     | 100.6±4.4    |
| Sample B                    |                            |       |                               |              |
| PB01                        | 100.0                      | 240.0 | 103.5[103.5]                  | 260.2[108.4] |
| PB02                        | 200.0                      | 150.0 | 195.3[97.7]                   | 145.2[96.8]  |
| PB03                        | 400.0                      | 90.0  | 407.5[101.2]                  | 86.0[95.6]   |
| AVG ± S.D.%                 |                            |       | 100.8±2.9                     | 100.3±7.1    |
| Sample C                    |                            |       |                               |              |
| PC01                        | 100.0                      | 240.0 | 213.6[98.3]                   | 249.9[104.1] |
| PC02                        | 200.0                      | 150.0 | 307.5[96.3]                   | 158.3[105.5] |
| PC03                        | 400.0                      | 90.0  | 498.3[95.8]                   | 93.0[103.3]  |
| AVG ± S.D.%                 |                            |       | 96.8±1.3                      | 104.3±1.1    |
| <i>t</i> -test <sup>c</sup> |                            |       | 0.91                          | 0.93         |

<sup>a</sup> values in the square brackets are recoveries, %

<sup>b</sup> the average recovery rates (mean ± standard deviation)

$$\frac{|\bar{X}_d|\sqrt{n}}{S_d}$$

<sup>c</sup> *t*-test =  $\frac{|\bar{X}_d|\sqrt{n}}{S_d}$ , where  $\bar{X}_d$  is the mean of the differences between the prediction concentration values obtained from two

methods,  $S_d$  is the standard deviation of these differences, and  $n$  is the total numbers of prediction samples. At the 95%

confidence level, the critical value for *t* is 2.31.

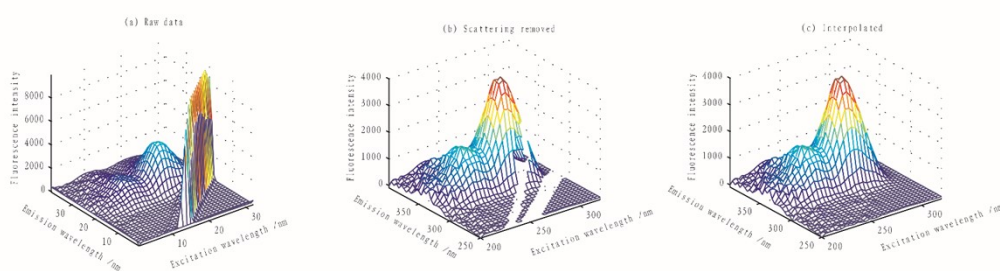

**Fig. S1** The deduction of Rayleigh scattering and Raman scattering in EEM fluorescence data: (a) raw data with Rayleigh scattering and first order Raman scattering; (b) gapped data with scattering being removed in the regions; (c) prosthetic data fitted by an interpolation method.

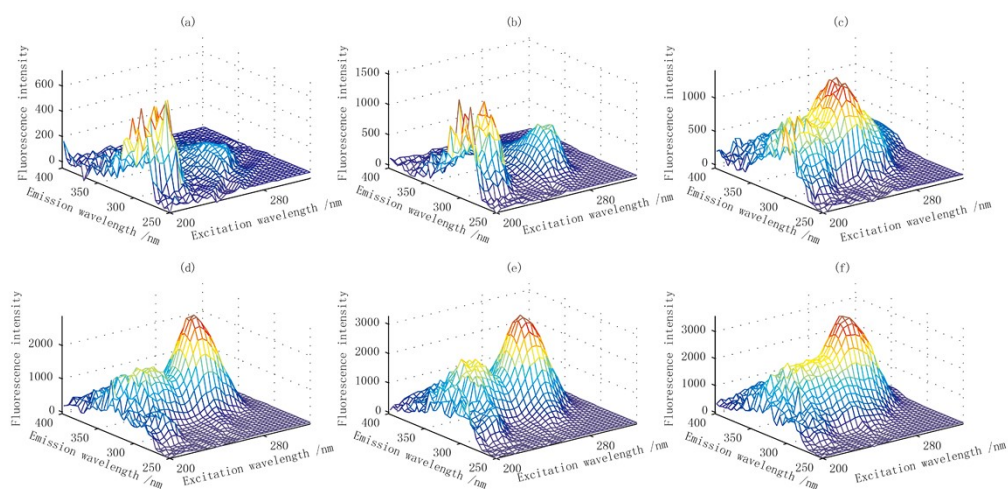

**Fig. S2** 3-D landscapes of the excitation-emission matrix fluorescence: (a) UA02; (b)UB02; (c) UC02; (d)PA02; (e)PB02and (f) PC02.

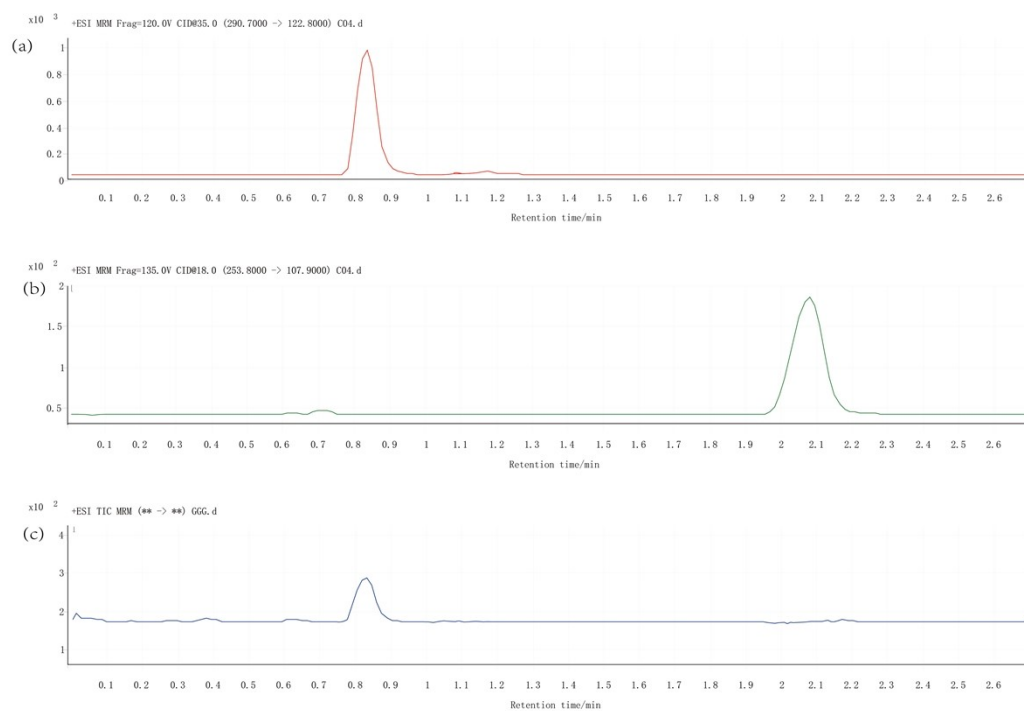

**Fig. S3** Typical extracted MRM ion chromatogram. (a) TMP (290.7 → 122.8) (b)SMZ (253.8 → 107.9) (c) Sample C

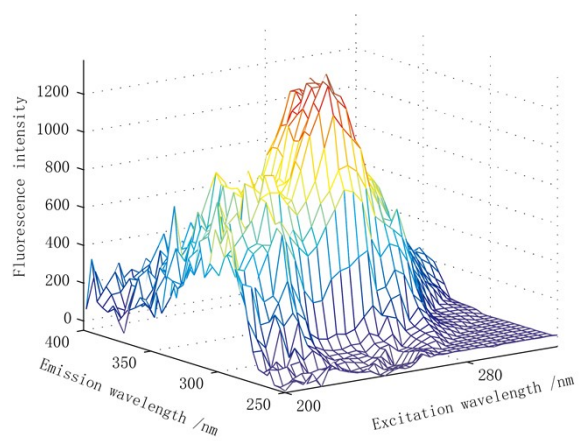

**Fig. S4** 3-D landscapes of the excitation-emission matrix fluorescence for Sample C
